# Supplementary material for: Aerodynamic size-resolved composition and cloud condensation nuclei properties of aerosols in a Beijing suburban region
Source: Copernicus journal article supplement (doi:10.5194/acp-22-4375-2022), 2022-04-05
Supplement: Supplementary file 1 [file acp-22-4375-2022-supplement.pdf]

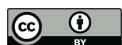

*Supplement of*

## **Aerodynamic size-resolved composition and cloud condensation nuclei properties of aerosols in a Beijing suburban region**

**Chenjie Yu et al.**

*Correspondence to:* Dantong Liu ([dantongliu@zju.edu.cn](mailto:dantongliu@zju.edu.cn)) and James D. Allan ([james.allan@manchester.ac.uk](mailto:james.allan@manchester.ac.uk))

The copyright of individual parts of the supplement might differ from the article licence.

## 28 S1. The instruments overview

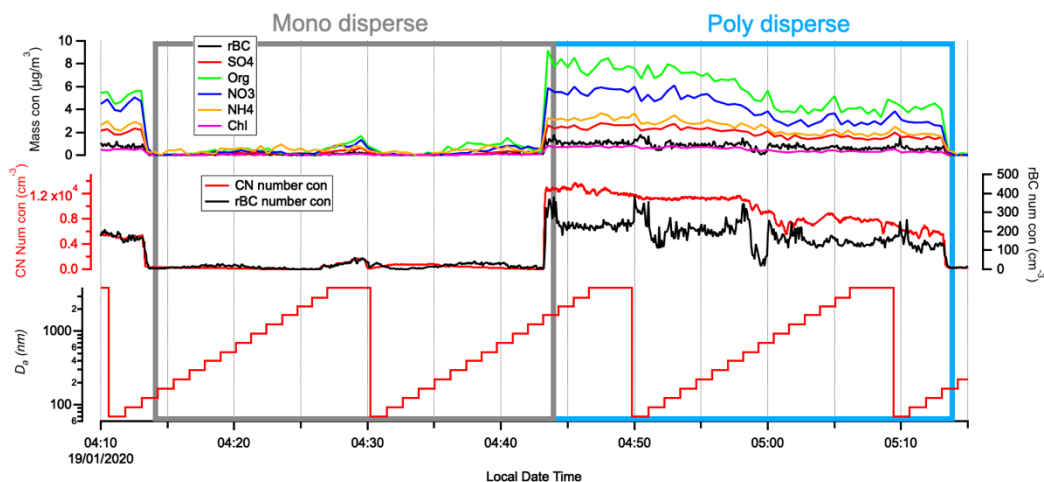

29

30

Figure S1. Example of a running cycle.

31

32 The size bins with  $D_a$  below 90 nm and above 1100 nm is excluded in this study since  
 33 it is beyond the detection range of SP2 and AMS. The peak of aerosol concentrations  
 34 at the end of each scan is caused by the purge and transition period of the AAC.

35

## 36 S2. Calculation of aerosol properties parameters

37 The particle density of all and non-refractory (NR) particles are calculated through:

$$38 \quad \rho_{\text{all}} = \frac{M_{\text{all}}}{V_{\text{all}}} \quad (1)$$

$$39 \quad \rho_{\text{NR}} = \frac{M_{\text{NR}}}{V_{\text{NR}}} \quad (2)$$

40 Where  $M_{\text{all}}$  is the mass concentration of all particles from the AMS and SP2 results,  
 41  $V_{\text{all}}$  is derived through the mass concentration of each measured composition mass  
 42 concentration and the material density shown in Table S1. The calculation of  $\rho_{\text{NR}}$  is

43 similar to the calculation of  $\rho_{\text{all}}$ , but only NR compositions from AMS are included  
 44 here.

45 The particle density of rBCc is derived by:

$$46 \quad \rho_{\text{rBCc}} = \frac{M_{\text{rBCc}}}{V_{\text{rBCc}}} = \frac{\rho_{\text{NR}} \cdot \left( \frac{1}{6} \pi D_{\text{p,rBCc}}^3 - \frac{1}{6} \pi D_{\text{c}}^3 \right) + M_{\text{rBC}}}{\frac{1}{6} \pi D_{\text{p,rBCc}}^3} \quad (3)$$

47 where  $M_{\text{rBCc}}$  and  $V_{\text{rBCc}}$  are the mass and volume of the rBCc respectively, the density  
 48 of rBCc coating is assumed to be the same as bulk non-refractory particle density. The  
 49 rBC core diameter ( $D_{\text{c}}$ ) and total rBCc diameter ( $D_{\text{p,rBCc}}$ ) are derived through the SP2  
 50 LEO method.

51 The average single particle mass for all particles and rBCc is calculate by:

$$52 \quad M_{\text{single,all}} = \frac{M_{\text{all}}}{N_{\text{total}}} \quad (4)$$

$$53 \quad M_{\text{single,rBCc}} = \frac{M_{\text{rBCc}}}{N_{\text{rBCc}}} \quad (5)$$

54 Where  $N_{\text{total}}$  and  $N_{\text{rBCc}}$  is the number concentration for total CN and rBCc respectively.

55 Then the volume equivalent diameter of all particle is assumed to equal to the mass  
 56 equivalent diameter:

$$57 \quad D_{v,\text{all}} = D_{m,\text{all}} = \sqrt[3]{\frac{6M_{\text{single,all}}}{\rho_{\text{all}} \cdot \pi}} \quad (6)$$

58 The shape factor is derived from:

$$59 \quad \chi = \frac{\rho_{\text{p}} D_{\text{v}}^2 C_{\text{c}}(D_{\text{v}})}{D_{\text{a}}^2 C_{\text{c}}(D_{\text{a}})} \quad (7)$$

### 60 S3. The size-resolved aerosol composition volume fractions

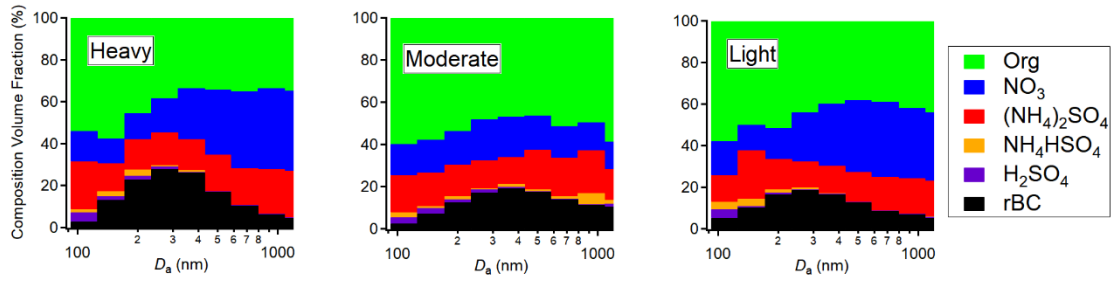

61  
62 Figure S2 Composition volume fractions under different pollution level

63

### 64 S4. The simplified ion pairing scheme

65 Details about this ion pairing scheme is discussed in Gysel et al(Gysel et al., 2007), the  
66 solutions are expressed as below:

67 
$$n_{\text{NH}_4\text{NO}_3} = n_{\text{NO}_3^-}$$

68 
$$n_{\text{H}_2\text{SO}_4} = \max(0, n_{\text{SO}_4^{2-}} - n_{\text{NH}_4^+} + n_{\text{NO}_3^-})$$

69 
$$n_{\text{NH}_4\text{HSO}_4} = \min(2n_{\text{SO}_4^{2-}} - n_{\text{NH}_4^+} + n_{\text{NO}_3^-}, n_{\text{NH}_4^+} - n_{\text{NO}_3^-})$$

70 
$$n_{(\text{NH}_4)_2\text{SO}_4} = \max(n_{\text{NH}_4^+} - n_{\text{NO}_3^-} - n_{\text{SO}_4^{2-}}, 0)$$

71 
$$n_{\text{HNO}_3} = 0$$

72 where  $n$  represents the number of moles for each component.

73

74

75

76

77 **S5. Density and hygroscopicity parameter for each composition**

78

|                                                 | Density (kg/m <sup>3</sup> ) | $\kappa$                              |
|-------------------------------------------------|------------------------------|---------------------------------------|
| NH <sub>4</sub> NO <sub>3</sub>                 | 1720                         | 0.67 (Petters and Kreidenweis, 2007)  |
| (NH <sub>4</sub> ) <sub>2</sub> SO <sub>4</sub> | 1769                         | 0.61 (Petters and Kreidenweis, 2007)  |
| (NH <sub>4</sub> )HSO <sub>4</sub>              | 1780                         | 0.65 (Petters and Kreidenweis, 2007)  |
| H <sub>2</sub> SO <sub>4</sub>                  | 1830                         | 0.90 (Petters and Kreidenweis, 2007)  |
| Organics (Org)                                  | 1400                         | 0.29*(O:C ratio) (Chang et al., 2010) |
| Black Carbon (BC)                               | 1800                         | 0                                     |

79

80 Table S1. The material density and hygroscopicity parameter ( $\kappa$ ) used for calculation.

81

82 **S6. Mass absorption coefficient calculation**

83 The mass absorption coefficient of rBCc at 880 nm (MAC<sub>880</sub>) and at 550 nm (MAC<sub>550</sub>)

84 is calculated by using the core-shell Mie theory approach(Bohren and Huffman, 2008).

85 The refractive index of coating material is assumed to be  $1.5 - 0i$ , and the refractive

86 index of rBC core is assumed to be  $2.26 - 1.26i$  (Taylor et al., 2020). The coating

87 material of rBCc is assumed to be non-absorbing. Both coated and uncoated cases are

88 calculated to present the absorption enhancement from lensing effect of coatings at

89 different size.

90

91

92

93

94 **S7. Correlation between measured and modelled rBCc activation**

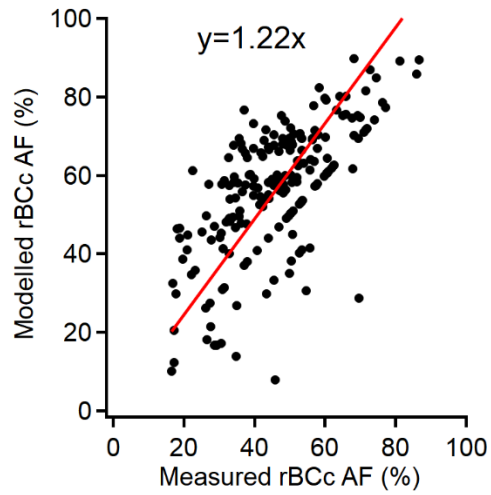

95

96 Figure S3 Correlation between measured and modelled rBCc activation fraction (AF)

97 using Orthogonal Distance Regression (ODR) fitting method.

98

99 **S8. PM<sub>1</sub> frequency distribution**

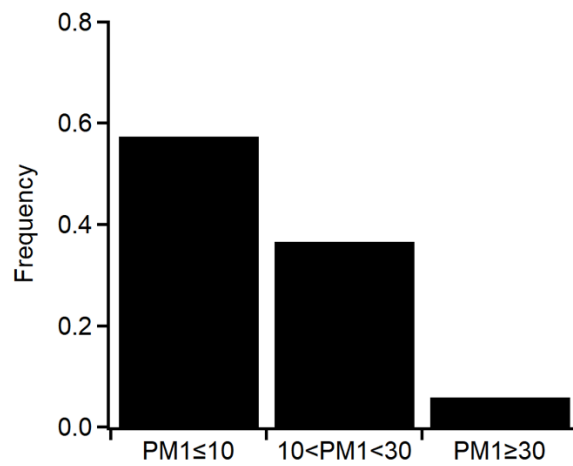

100

101 Figure S4 Frequency distribution of PM<sub>1</sub> concentrations

102

103 **References**

104

- 105 Bohren, C. F., and Huffman, D. R.: Absorption and scattering of light by small  
106 particles, John Wiley & Sons, 2008.
- 107 Chang, R. Y. W., Slowik, J. G., Shantz, N. C., Vlasenko, A., Liggio, J., Sjostedt, S. J.,  
108 Leaitch, W. R., and Abbatt, J. P. D.: The hygroscopicity parameter ( $\kappa$ ) of ambient  
109 organic aerosol at a field site subject to biogenic and anthropogenic influences:  
110 relationship to degree of aerosol oxidation, *Atmos. Chem. Phys.*, 10, 5047-5064,  
111 10.5194/acp-10-5047-2010, 2010.
- 112 Gysel, M., Crosier, J., Topping, D. O., Whitehead, J. D., Bower, K. N., Cubison, M.  
113 J., Williams, P. I., Flynn, M. J., McFiggans, G. B., and Coe, H.: Closure study  
114 between chemical composition and hygroscopic growth of aerosol particles during  
115 TORCH2, *Atmos. Chem. Phys.*, 7, 6131-6144, 10.5194/acp-7-6131-2007, 2007.
- 116 Petters, M. D., and Kreidenweis, S. M.: A single parameter representation of  
117 hygroscopic growth and cloud condensation nucleus activity, *Atmos. Chem. Phys.*, 7,  
118 1961-1971, 10.5194/acp-7-1961-2007, 2007.
- 119 Taylor, J. W., Wu, H., Szpek, K., Bower, K., Crawford, I., Flynn, M. J., Williams, P.  
120 I., Dorsey, J., Langridge, J. M., Cotterell, M. I., Fox, C., Davies, N. W., Haywood, J.  
121 M., and Coe, H.: Absorption closure in highly aged biomass burning smoke, *Atmos.*  
122 *Chem. Phys.*, 20, 11201-11221, 10.5194/acp-20-11201-2020, 2020.
- 123
